# Supplementary material for: Effect of donor–acceptor orientation on solvent-dependent three-photon activity in through-space charge-transfer systems – case study of [2,2]-paracyclophane derivatives
Source: Royal Society of Chemistry journal article supplement (doi:10.1039/c3cp52696h), 2013-01-01
Supplement: c3cp52696h.pdf [file c3cp52696h.pdf]

## Supporting information

# Role of Donor-Acceptor Orientation on Solvent-Dependent Three-Photon Activity in Through-Space Charge-Transfer Systems - Case Study of [2, 2]-Paracyclophane Derivatives

Md. MehboobAlam,<sup>a</sup> Mausumi Chattopadhyaya<sup>a</sup>, Swapan Chakrabarti\*<sup>a</sup> and Kenneth Ruud<sup>b</sup>

<sup>a</sup>Department of Chemistry, University of Calcutta, 92 A.P.C. Road Kolkata 700009, India.

<sup>b</sup>Centre for Theoretical and Computational Chemistry, Department of Chemistry, UiT, The Arctic University of Tromsø, N-9037 Tromsø, Norway

### Contents

- 1) Optimized coordinates of A) PCP1, B) PCP2 and C) PCP3 in i) Gas phase, ii) MeCN solvent and iii) THF solvent
- 2) One photon data for PCP1, PCP2 and PCP3 in gas phase calculated at BLYP and B3LYP functionals and cc-pVDZ basis set
- 3)  $\delta^{3PA}$  and one-photon excitation energies of all the systems in gas phase calculated by varying the  $\mu$ -parameter of CAMB3LYP functional

A) Optimized Cartesian Coordinates of PCP1

i) In gas phase

| Atomic Symbol | X           | Y           | Z           |
|---------------|-------------|-------------|-------------|
| C             | 1.02085208  | 1.36653810  | -0.88694507 |
| C             | 1.30141810  | 1.47920811  | 0.47393604  |
| C             | 0.27648302  | 1.19556509  | 1.40240111  |
| C             | -1.02072508 | 1.36724711  | 0.88605407  |
| C             | -1.30127910 | 1.47886111  | -0.47491604 |
| C             | -0.27634702 | 1.19446509  | -1.40314211 |
| H             | 1.82649014  | 1.31546210  | -1.60797512 |
| H             | -1.82638814 | 1.31666910  | 1.60709112  |
| C             | 1.01725908  | -1.87207914 | -0.99937108 |
| C             | 1.31544510  | -1.83507514 | 0.37441503  |
| C             | 0.33494503  | -1.66698513 | 1.36252510  |
| C             | -1.01737008 | -1.87114114 | 1.00070508  |
| C             | -1.31555110 | -1.83523614 | -0.37310803 |
| C             | -0.33502703 | -1.66800613 | -1.36134910 |
| H             | 2.35343218  | -1.85746614 | 0.69040105  |
| H             | -2.35354918 | -1.85765414 | -0.68906105 |
| C             | -0.38676803 | 0.52473204  | -2.76804921 |
| H             | -1.10481509 | 1.00079807  | -3.44390926 |
| H             | 0.58663304  | 0.62169405  | -3.25420125 |
| C             | -0.72973506 | -1.03525808 | -2.68394121 |
| H             | -1.80464014 | -1.17398509 | -2.83363422 |
| H             | -0.24234102 | -1.48562512 | -3.55055727 |
| C             | 0.38690003  | 0.52672904  | 2.76775621  |
| H             | 1.10499909  | 1.00318708  | 3.44328826  |
| H             | -0.58647404 | 0.62409605  | 3.25387825  |
| C             | 0.72974106  | -1.03334808 | 2.68466521  |
| H             | 0.24233602  | -1.48309911 | 3.55159327  |
| H             | 1.80463814  | -1.17206709 | 2.83440922  |
| N             | 2.69177921  | 1.91606815  | 0.91695607  |
| N             | -2.69165121 | 1.91529614  | -0.91832707 |
| N             | -2.00612415 | -1.94009515 | 2.01348415  |
| N             | 2.00596815  | -1.94208515 | -2.01212915 |
| C             | 2.53114119  | 3.13373624  | 1.81553714  |
| H             | 1.92791115  | 2.86768522  | 2.68046621  |
| H             | 3.52289527  | 3.45761426  | 2.13520116  |
| H             | 2.04161916  | 3.92187030  | 1.24328010  |
| C             | 3.47171726  | 0.85171406  | 1.66637512  |
| H             | 2.97459723  | 0.62795205  | 2.60438720  |
| H             | 3.52966527  | -0.03838500 | 1.04420108  |
| H             | 4.47062934  | 1.24327010  | 1.86395014  |
| C             | 3.55712127  | 2.35317318  | -0.24887302 |
| H             | 3.02787423  | 3.10651324  | -0.83099406 |
| H             | 4.47083034  | 2.78035721  | 0.16422901  |
| H             | 3.80844329  | 1.49008012  | -0.86398806 |
| C             | -3.55700027 | 2.35338718  | 0.24711702  |
| H             | -3.02779823 | 3.10728824  | 0.82855206  |
| H             | -4.47074634 | 2.78012121  | -0.16635701 |
| H             | -3.80821429 | 1.49081312  | 0.86299706  |
| C             | -2.53104019 | 3.13217524  | -1.81798814 |
| H             | -1.92793115 | 2.86535022  | -2.68276321 |

|   |             |             |             |
|---|-------------|-------------|-------------|
| H | -3.52281027 | 3.45585127  | -2.13782216 |
| H | -2.04139116 | 3.92077230  | -1.24647909 |
| C | -3.47155626 | 0.85027807  | -1.66685313 |
| H | -2.97439423 | 0.62570705  | -2.60465420 |
| H | -3.52955327 | -0.03930400 | -1.04394208 |
| H | -4.47045734 | 1.24166710  | -1.86481814 |
| C | 1.87179815  | -3.08422523 | -2.94107423 |
| H | 0.82573606  | -3.26237925 | -3.18792424 |
| H | 2.42006518  | -2.87031822 | -3.86352030 |
| H | 2.27431317  | -4.00915630 | -2.50088719 |
| C | 3.39733626  | -1.79937014 | -1.60390012 |
| H | 3.54229227  | -0.85628306 | -1.06374108 |
| H | 3.75990729  | -2.62363620 | -0.96708808 |
| H | 4.02509631  | -1.77082214 | -2.49888819 |
| C | -3.39743126 | -1.79742114 | 1.60503912  |
| H | -3.54213327 | -0.85473307 | 1.06410708  |
| H | -3.76013429 | -2.62211320 | 0.96885507  |
| H | -4.02524231 | -1.76801914 | 2.49996119  |
| C | -1.87224814 | -3.08149324 | 2.94338922  |
| H | -0.82623606 | -3.25963525 | 3.19047224  |
| H | -2.42054818 | -2.86672222 | 3.86561430  |
| H | -2.27489517 | -4.00671630 | 2.50393919  |

ii) In MeCN solvent

| Atomic Symbol | X           | Y           | Z           |
|---------------|-------------|-------------|-------------|
| C             | -1.01448373 | 1.37756129  | 0.89255785  |
| C             | -1.30287658 | 1.49386771  | -0.46517740 |
| C             | -0.28501479 | 1.20043148  | -1.39681766 |
| C             | 1.01441927  | 1.37748597  | -0.89276768 |
| C             | 1.30281074  | 1.49392359  | 0.46496756  |
| C             | 0.28495010  | 1.20057198  | 1.39662303  |
| H             | -1.81548984 | 1.34675222  | 1.61905584  |
| H             | 1.81541725  | 1.34660235  | -1.61926687 |
| C             | -0.99480983 | -1.89174609 | 1.01783198  |
| C             | -1.32242817 | -1.84365142 | -0.34878541 |
| C             | -0.36121410 | -1.67263571 | -1.35626036 |
| C             | 0.99493174  | -1.89175752 | -1.01769687 |
| C             | 1.32254628  | -1.84345549 | 0.34891798  |
| C             | 0.36131491  | -1.67244670 | 1.35637582  |
| H             | -2.36717600 | -1.83663884 | -0.64149882 |
| H             | 2.36729231  | -1.83629729 | 0.64163292  |
| C             | 0.40935568  | 0.52557146  | 2.75591604  |
| H             | 1.12283473  | 1.00619007  | 3.43180463  |
| H             | -0.56487158 | 0.60636081  | 3.24297170  |
| C             | 0.78014343  | -1.02390030 | 2.66527127  |
| H             | 1.86175407  | -1.13791552 | 2.77865990  |
| H             | 0.33021750  | -1.48408691 | 3.54775342  |
| C             | -0.40939261 | 0.52525024  | -2.75603010 |
| H             | -1.12287500 | 1.00575488  | -3.43199450 |

|   |             |             |             |
|---|-------------|-------------|-------------|
| H | 0.56483524  | 0.60602852  | -3.24308620 |
| C | -0.78010213 | -1.02423656 | -2.66521088 |
| H | -0.33015616 | -1.48448960 | -3.54764752 |
| H | -1.86170451 | -1.13834236 | -2.77858507 |
| N | -2.68049202 | 1.95994425  | -0.89830670 |
| N | 2.68037966  | 1.96008603  | 0.89817449  |
| N | 1.96410839  | -2.00263023 | -2.04960771 |
| N | -1.96398567 | -2.00258697 | 2.04975235  |
| C | -2.48745691 | 3.17713950  | -1.79128717 |
| H | -1.90759897 | 2.89355210  | -2.66572397 |
| H | -3.47131649 | 3.53668910  | -2.09237550 |
| H | -1.95954188 | 3.93881066  | -1.21913376 |
| C | -3.48812222 | 0.92082071  | -1.64975357 |
| H | -3.00706975 | 0.69992009  | -2.59638825 |
| H | -3.56813461 | 0.02445196  | -1.03954334 |
| H | -4.47844448 | 1.33696279  | -1.83299684 |
| C | -3.52650942 | 2.41796639  | 0.27264633  |
| H | -2.97420008 | 3.15994742  | 0.84612796  |
| H | -4.43082885 | 2.86317107  | -0.13913005 |
| H | -3.79493088 | 1.56507234  | 0.89341361  |
| C | 3.52656091  | 2.41812431  | -0.27266150 |
| H | 2.97417028  | 3.15980928  | -0.84644690 |
| H | 4.43061913  | 2.86371744  | 0.13926834  |
| H | 3.79544869  | 1.56520128  | -0.89318066 |
| C | 2.48715686  | 3.17731351  | 1.79106514  |
| H | 1.90722600  | 2.89372639  | 2.66545425  |
| H | 3.47096027  | 3.53695034  | 2.09223592  |
| H | 1.95924613  | 3.93891247  | 1.21881126  |
| C | 3.48792391  | 0.92105048  | 1.64984320  |
| H | 3.00665890  | 0.70015498  | 2.59637646  |
| H | 3.56815289  | 0.02465224  | 1.03970475  |
| H | 4.47816896  | 1.33727623  | 1.83330755  |
| C | -1.76836418 | -3.14985050 | 2.95081347  |
| H | -0.71656630 | -3.26456745 | 3.21135625  |
| H | -2.34019683 | -2.99170652 | 3.87107123  |
| H | -2.10838117 | -4.09238223 | 2.48949077  |
| C | -3.36746331 | -1.90673763 | 1.66774443  |
| H | -3.56502965 | -0.96854109 | 1.14410274  |
| H | -3.70546457 | -2.74039743 | 1.02800051  |
| H | -3.97647631 | -1.91397620 | 2.57636805  |
| C | 3.36758196  | -1.90661896 | -1.66764030 |
| H | 3.56505107  | -0.96835008 | -1.14409635 |
| H | 3.70567346  | -2.74017850 | -1.02781566 |
| H | 3.97658295  | -1.91388682 | -2.57627193 |
| C | 1.76857815  | -3.14996512 | -2.95059651 |
| H | 0.71677566  | -3.26484620 | -3.21104713 |
| H | 2.34031689  | -2.99179083 | -3.87090728 |
| H | 2.10876316  | -4.09242441 | -2.48925072 |

iii) In THF solvent

Atomic Symbol                      X                      Y                      Z

|   |             |             |             |
|---|-------------|-------------|-------------|
| C | -1.01311172 | 1.38647921  | 0.89386693  |
| C | -1.30479150 | 1.49844598  | -0.46358307 |
| C | -0.28731679 | 1.20930969  | -1.39712305 |
| C | 1.01293349  | 1.38643834  | -0.89414733 |
| C | 1.30460209  | 1.49869389  | 0.46327313  |
| C | 0.28715383  | 1.20961635  | 1.39687262  |
| H | -1.81209678 | 1.35573471  | 1.62225888  |
| H | 1.81190515  | 1.35568862  | -1.62254986 |
| C | -1.00023311 | -1.88375544 | 1.01315184  |
| C | -1.32006649 | -1.83618150 | -0.35536427 |
| C | -0.35395434 | -1.66372510 | -1.35776486 |
| C | 1.00048363  | -1.88387936 | -1.01281541 |
| C | 1.32031065  | -1.83596266 | 0.35569150  |
| C | 0.35417978  | -1.66339792 | 1.35805356  |
| H | -2.36285284 | -1.83759697 | -0.65503596 |
| H | 2.36309462  | -1.83721203 | 0.65537042  |
| C | 0.40953208  | 0.53678648  | 2.75746722  |
| H | 1.12783860  | 1.01401837  | 3.43088538  |
| H | -0.56260923 | 0.62667112  | 3.24696762  |
| C | 0.76727842  | -1.01704672 | 2.66972186  |
| H | 1.84681569  | -1.13961470 | 2.79374233  |
| H | 0.30504354  | -1.47214628 | 3.54816209  |
| C | -0.40959884 | 0.53620780  | -2.75759156 |
| H | -1.12797479 | 1.01320703  | -3.43109900 |
| H | 0.56252960  | 0.62614231  | -3.24710949 |
| C | -0.76712574 | -1.01766351 | -2.66955577 |
| H | -0.30481726 | -1.47285678 | -3.54790730 |
| H | -1.84664414 | -1.14040086 | -2.79356864 |
| N | -2.68988467 | 1.94888653  | -0.89421340 |
| N | 2.68963555  | 1.94938617  | 0.89384851  |
| N | 1.97463813  | -1.99666940 | -2.03900807 |
| N | -1.97437670 | -1.99636218 | 2.03937222  |
| C | -2.51482092 | 3.16973069  | -1.78583719 |
| H | -1.92417090 | 2.89668648  | -2.65656582 |
| H | -3.50280186 | 3.51223206  | -2.09404170 |
| H | -2.00605476 | 3.94223794  | -1.21077661 |
| C | -3.48590065 | 0.90161466  | -1.64810024 |
| H | -3.00205831 | 0.68847761  | -2.59514373 |
| H | -3.55525885 | 0.00244240  | -1.04076986 |
| H | -4.48118352 | 1.30683521  | -1.82965403 |
| C | -3.54079022 | 2.39277386  | 0.27881658  |
| H | -2.99892623 | 3.14340346  | 0.85138396  |
| H | -4.45343984 | 2.82330504  | -0.13043010 |
| H | -3.79422317 | 1.53535206  | 0.90038729  |
| C | 3.54051882  | 2.39328514  | -0.27919017 |
| H | 2.99855496  | 3.14374611  | -0.85188243 |
| H | 4.45306447  | 2.82404011  | 0.13005761  |
| H | 3.79415679  | 1.53583261  | -0.90064214 |
| C | 2.51437864  | 3.17028760  | 1.78534628  |
| H | 1.92379994  | 2.89722388  | 2.65611690  |
| H | 3.50230793  | 3.51298938  | 2.09349059  |
| H | 2.00545897  | 3.94264710  | 1.21022226  |

|   |             |             |             |
|---|-------------|-------------|-------------|
| C | 3.48580344  | 0.90232547  | 1.64787169  |
| H | 3.00202617  | 0.68927658  | 2.59496787  |
| H | 3.55524841  | 0.00306937  | 1.04067641  |
| H | 4.48104328  | 1.30770169  | 1.82932264  |
| C | -1.78134668 | -3.14178753 | 2.94490232  |
| H | -0.73053211 | -3.25556546 | 3.20926056  |
| H | -2.35670485 | -2.98097795 | 3.86236235  |
| H | -2.11885545 | -4.08494952 | 2.48435232  |
| C | -3.37543446 | -1.90647559 | 1.64790449  |
| H | -3.57229375 | -0.96683320 | 1.12540119  |
| H | -3.70570427 | -2.73926785 | 1.00341561  |
| H | -3.99113780 | -1.91881266 | 2.55181021  |
| C | 3.37568994  | -1.90662987 | -1.64756635 |
| H | 3.57251740  | -0.96686476 | -1.12527602 |
| H | 3.70599848  | -2.73926340 | -1.00289076 |
| H | 3.99139371  | -1.91914896 | -2.55147079 |
| C | 1.78167803  | -3.14230758 | -2.94428162 |
| H | 0.73086663  | -3.25624668 | -3.20857713 |
| H | 2.35699086  | -2.98164893 | -3.86179648 |
| H | 2.11929107  | -4.08533644 | -2.48353607 |

## B) Optimized Coordinates of PCP2

### i) In Gas phase

| Atomic Symbol | X           | Y           | Z           |
|---------------|-------------|-------------|-------------|
| C             | -0.79892606 | 1.39593211  | 1.19147109  |
| C             | 0.60968305  | 1.30959010  | 1.26335310  |
| C             | 1.25272410  | 1.63593212  | 0.05403600  |
| C             | 0.54371004  | 1.47755812  | -1.13992709 |
| C             | -0.83001907 | 1.20771909  | -1.21033409 |
| C             | -1.51962911 | 1.44791911  | 0.00261800  |
| H             | -1.31877610 | 1.33272910  | 2.13842317  |
| H             | 1.08063308  | 1.47889611  | -2.08243316 |
| C             | -0.34809803 | -1.76849614 | 1.27057010  |
| C             | 1.01993808  | -1.54212312 | 1.09084808  |
| C             | 1.56807612  | -1.79974214 | -0.19177001 |
| C             | 0.66743905  | -1.78666814 | -1.27291210 |
| C             | -0.71615806 | -1.66697613 | -1.10122708 |
| C             | -1.24133910 | -1.90038015 | 0.19605101  |
| H             | -0.73213705 | -1.74267213 | 2.28501517  |
| H             | 1.04946608  | -1.78149614 | -2.28832117 |
| C             | -1.32482410 | 0.48194704  | -2.45544719 |
| H             | -2.23703517 | 0.90494707  | -2.88794722 |
| H             | -0.55721604 | 0.60822505  | -3.22408125 |
| C             | -1.55198112 | -1.08720208 | -2.23178917 |
| H             | -2.61274020 | -1.25713910 | -2.05146816 |
| H             | -1.31809610 | -1.56471912 | -3.18962325 |
| C             | 1.79334214  | -0.80973206 | 2.17791017  |
| H             | 1.81775814  | -1.35597510 | 3.12885824  |

|   |             |             |             |
|---|-------------|-------------|-------------|
| H | 2.83422322  | -0.68908605 | 1.86615314  |
| C | 1.18325209  | 0.61663105  | 2.50124319  |
| H | 1.92627115  | 1.19846709  | 3.05083323  |
| H | 0.34952403  | 0.48258404  | 3.19603424  |
| N | -3.00155123 | 1.78368014  | 0.03117000  |
| N | 2.68181120  | 2.13828616  | -0.07102901 |
| N | 2.97250023  | -1.93304915 | -0.36616903 |
| N | -2.63574420 | -2.13012616 | 0.38524503  |
| C | 3.55535227  | 1.22123609  | -0.90988907 |
| H | 3.52800827  | 0.21431602  | -0.48097404 |
| H | 3.18188124  | 1.20873409  | -1.93235015 |
| H | 4.56809335  | 1.62775412  | -0.90317207 |
| C | 2.62557320  | 3.50912127  | -0.73122405 |
| H | 2.03915115  | 4.17558732  | -0.09794801 |
| H | 3.64652028  | 3.88059630  | -0.83109306 |
| H | 2.16499317  | 3.42308826  | -1.71329413 |
| C | 3.37906426  | 2.33829318  | 1.25541909  |
| H | 4.31908833  | 2.85330722  | 1.05678108  |
| H | 2.75219921  | 2.95096323  | 1.90142914  |
| H | 3.58663327  | 1.37090510  | 1.70478113  |
| C | -3.50560627 | 2.05457416  | 1.43305111  |
| H | -2.89335022 | 2.82379921  | 1.90174414  |
| H | -4.53287434 | 2.40831118  | 1.34885810  |
| H | -3.48731827 | 1.13006809  | 2.00933215  |
| C | -3.19045924 | 3.06764623  | -0.76212106 |
| H | -2.61454720 | 3.86164329  | -0.28581202 |
| H | -2.84163022 | 2.90986222  | -1.78104014 |
| H | -4.25289432 | 3.31689425  | -0.76332006 |
| C | -3.10452824 | -2.16436816 | 1.77281114  |
| H | -4.18981832 | -2.29573217 | 1.77261714  |
| H | -2.66514720 | -2.98784823 | 2.35709318  |
| H | -2.87404722 | -1.22339309 | 2.28498518  |
| C | -3.15086324 | -3.31616425 | -0.33853103 |
| H | -4.24454232 | -3.29511325 | -0.33040803 |
| H | -2.81104622 | -3.31777325 | -1.37399011 |
| H | -2.81445921 | -4.25076632 | 0.13331801  |
| C | 3.43712526  | -2.12592316 | -1.74412613 |
| H | 4.52825035  | -2.18535116 | -1.73911513 |
| H | 3.04714123  | -3.04980923 | -2.19793017 |
| H | 3.14702424  | -1.28371610 | -2.37956218 |
| C | 3.60517227  | -2.94676023 | 0.50951404  |
| H | 4.69118236  | -2.82729722 | 0.46568204  |
| H | 3.28750125  | -2.82706022 | 1.54451912  |
| H | 3.35069326  | -3.96720930 | 0.18869601  |
| C | -3.90356930 | 0.70528706  | -0.55797904 |
| H | -3.81179129 | 0.71929106  | -1.63999213 |
| H | -3.60176927 | -0.27003402 | -0.16035201 |
| H | -4.93081538 | 0.95057307  | -0.28517202 |

ii) In MeCN solvent

Atomic Symbol                      X                      Y                      Z

|   |             |             |             |
|---|-------------|-------------|-------------|
| C | -0.78908061 | 1.37532382  | 1.18980565  |
| C | 0.61644726  | 1.28538917  | 1.26199917  |
| C | 1.26254992  | 1.60975522  | 0.05404220  |
| C | 0.56123835  | 1.43694028  | -1.14079050 |
| C | -0.81222715 | 1.17099563  | -1.20866870 |
| C | -1.50322857 | 1.42756663  | -0.00152803 |
| H | -1.31271867 | 1.32380806  | 2.13498532  |
| H | 1.09911171  | 1.43728448  | -2.08196101 |
| C | -0.35317833 | -1.80477588 | 1.28293742  |
| C | 1.01335982  | -1.57213690 | 1.09641009  |
| C | 1.55207005  | -1.82330487 | -0.19095066 |
| C | 0.64699495  | -1.81849014 | -1.26763941 |
| C | -0.73597923 | -1.70455539 | -1.08935845 |
| C | -1.25131417 | -1.94000563 | 0.21145428  |
| H | -0.73665150 | -1.75634919 | 2.29654803  |
| H | 1.02472294  | -1.78332689 | -2.28383609 |
| C | -1.31364103 | 0.44349103  | -2.44837576 |
| H | -2.21578188 | 0.87904915  | -2.88843118 |
| H | -0.53668308 | 0.54426209  | -3.21043336 |
| C | -1.57659137 | -1.11334460 | -2.21124523 |
| H | -2.63731009 | -1.25582181 | -2.00847916 |
| H | -1.36994854 | -1.60557213 | -3.16823184 |
| C | 1.79450382  | -0.83183685 | 2.17359248  |
| H | 1.82971413  | -1.37765968 | 3.12452255  |
| H | 2.83026179  | -0.70674194 | 1.84831917  |
| C | 1.18576826  | 0.59190403  | 2.49896017  |
| H | 1.93355256  | 1.16845757  | 3.04646146  |
| H | 0.35045670  | 0.45772319  | 3.19118302  |
| N | -2.97111991 | 1.80182791  | 0.01734936  |
| N | 2.67249828  | 2.15236163  | -0.06036098 |
| N | 2.95719956  | -1.93901065 | -0.37643744 |
| N | -2.64253821 | -2.17159586 | 0.40935135  |
| C | 3.58043579  | 1.26637279  | -0.89014877 |
| H | 3.58255646  | 0.26475541  | -0.45613827 |
| H | 3.21613842  | 1.23974798  | -1.91492679 |
| H | 4.57844232  | 1.70452846  | -0.87327760 |
| C | 2.57338107  | 3.51924262  | -0.72393116 |
| H | 1.95101861  | 4.15950066  | -0.09966929 |
| H | 3.58158886  | 3.92512154  | -0.80577297 |
| H | 2.13191978  | 3.41127686  | -1.71187015 |
| C | 3.34540668  | 2.37671410  | 1.27270170  |
| H | 4.26777958  | 2.92363792  | 1.08279498  |
| H | 2.68772582  | 2.96628440  | 1.90832672  |
| H | 3.58288041  | 1.41766343  | 1.72442173  |
| C | -3.46892469 | 2.11708358  | 1.41131620  |
| H | -2.83195712 | 2.87481468  | 1.86335419  |
| H | -4.48248858 | 2.50127830  | 1.31079115  |
| H | -3.48287173 | 1.20741407  | 2.00851973  |
| C | -3.11754928 | 3.07575606  | -0.79968663 |
| H | -2.51309417 | 3.85537341  | -0.33715564 |
| H | -2.77501194 | 2.88718927  | -1.81456516 |
| H | -4.17087769 | 3.35619810  | -0.80182624 |



|   |             |             |             |
|---|-------------|-------------|-------------|
| C | -3.10965067 | -2.21753904 | 1.79441959  |
| H | -4.19748420 | -2.32766056 | 1.78972561  |
| H | -2.68240121 | -3.06157218 | 2.36157138  |
| H | -2.86563153 | -1.29271488 | 2.32291683  |
| C | -3.17402559 | -3.32872245 | -0.33298341 |
| H | -4.26774888 | -3.29133995 | -0.32130825 |
| H | -2.83938977 | -3.31397879 | -1.37006979 |
| H | -2.85247468 | -4.28170482 | 0.11821650  |
| C | 3.42118880  | -2.08520068 | -1.75597017 |
| H | 4.51428335  | -2.10315620 | -1.75451996 |
| H | 3.06167593  | -3.01450732 | -2.22809510 |
| H | 3.09754826  | -1.24170858 | -2.37027396 |
| C | 3.60651461  | -2.94916543 | 0.47783858  |
| H | 4.69114887  | -2.81392306 | 0.42882414  |
| H | 3.29505053  | -2.84359997 | 1.51654379  |
| H | 3.36662426  | -3.97331342 | 0.14873143  |
| C | -3.89839748 | 0.74108438  | -0.55408073 |
| H | -3.79473331 | 0.72247887  | -1.63463697 |
| H | -3.63622917 | -0.22847288 | -0.12514784 |
| H | -4.91917253 | 1.02614511  | -0.29956331 |

iii) In THF solvent

| Atomic Symbol | X           | Y           | Z           |
|---------------|-------------|-------------|-------------|
| C             | -0.78936335 | 1.37766208  | 1.18652185  |
| C             | 0.61665564  | 1.29033438  | 1.25968941  |
| C             | 1.26246452  | 1.61690462  | 0.05215640  |
| C             | 0.56047669  | 1.44574494  | -1.14291581 |
| C             | -0.81254079 | 1.17583847  | -1.21232026 |
| C             | -1.50478996 | 1.42758656  | -0.00445853 |
| H             | -1.31261850 | 1.32085641  | 2.13156934  |
| H             | 1.09907565  | 1.44741287  | -2.08383733 |
| C             | -0.35126862 | -1.79529997 | 1.28272703  |
| C             | 1.01537442  | -1.56602962 | 1.09458223  |
| C             | 1.55334879  | -1.81922983 | -0.19256051 |
| C             | 0.64711675  | -1.81391943 | -1.26812060 |
| C             | -0.73541322 | -1.69853721 | -1.08861502 |
| C             | -1.25075071 | -1.92965164 | 0.21273884  |
| H             | -0.73256222 | -1.74776043 | 2.29725681  |
| H             | 1.02282280  | -1.78467344 | -2.28539190 |
| C             | -1.30897782 | 0.44538628  | -2.45296313 |
| H             | -2.20670751 | 0.88212130  | -2.90098747 |
| H             | -0.52683108 | 0.54211491  | -3.21034867 |
| C             | -1.57427202 | -1.11086865 | -2.21316263 |
| H             | -2.63550249 | -1.25343288 | -2.01359298 |
| H             | -1.36511794 | -1.60504538 | -3.16845964 |
| C             | 1.79668364  | -0.82660413 | 2.17180114  |
| H             | 1.83164402  | -1.37225000 | 3.12276504  |
| H             | 2.83275770  | -0.70108222 | 1.84761914  |
| C             | 1.18524931  | 0.59591337  | 2.49715632  |

|   |             |             |             |
|---|-------------|-------------|-------------|
| H | 1.92909992  | 1.17387974  | 3.04865726  |
| H | 0.34812079  | 0.45809872  | 3.18653933  |
| N | -2.97631234 | 1.79173320  | 0.01641920  |
| N | 2.67556287  | 2.15283251  | -0.06221288 |
| N | 2.95812196  | -1.93785744 | -0.37866892 |
| N | -2.64313742 | -2.15569151 | 0.41238826  |
| C | 3.58092636  | 1.26152602  | -0.89064699 |
| H | 3.57314733  | 0.25692613  | -0.46219651 |
| H | 3.22293721  | 1.24377125  | -1.91798884 |
| H | 4.58207625  | 1.69241856  | -0.86652677 |
| C | 2.58659609  | 3.52014062  | -0.72638100 |
| H | 1.97365403  | 4.16780960  | -0.10027532 |
| H | 3.59801814  | 3.91753907  | -0.81297653 |
| H | 2.14000828  | 3.41628021  | -1.71257295 |
| C | 3.34690370  | 2.37397326  | 1.27224006  |
| H | 4.27315984  | 2.91536538  | 1.08514034  |
| H | 2.68994593  | 2.96676872  | 1.90594535  |
| H | 3.57768044  | 1.41369097  | 1.72466825  |
| C | -3.48216449 | 2.07770304  | 1.41394890  |
| H | -2.85476546 | 2.83375270  | 1.88245604  |
| H | -4.49928530 | 2.45389058  | 1.31799066  |
| H | -3.48935467 | 1.15690878  | 1.99431544  |
| C | -3.12889592 | 3.07879850  | -0.77851166 |
| H | -2.53736515 | 3.85703636  | -0.29719056 |
| H | -2.77618971 | 2.91221447  | -1.79379127 |
| H | -4.18467493 | 3.34985140  | -0.78478617 |
| C | -3.10744452 | -2.19489721 | 1.79919241  |
| H | -4.19495237 | -2.30779266 | 1.79741301  |
| H | -2.67789115 | -3.03422306 | 2.37063151  |
| H | -2.86375349 | -1.26605670 | 2.32242103  |
| C | -3.17486549 | -3.32000011 | -0.32119724 |
| H | -4.26851122 | -3.28528429 | -0.30496067 |
| H | -2.84380536 | -3.31060924 | -1.35946874 |
| H | -2.84838242 | -4.26836934 | 0.13465287  |
| C | 3.41852464  | -2.09673447 | -1.75865486 |
| H | 4.51139103  | -2.12062718 | -1.75961665 |
| H | 3.05305214  | -3.02732434 | -2.22259641 |
| H | 3.09791076  | -1.25638642 | -2.37927342 |
| C | 3.60554375  | -2.94793275 | 0.47935466  |
| H | 4.69051555  | -2.81753703 | 0.42685533  |
| H | 3.29676407  | -2.83714062 | 1.51819771  |
| H | 3.35991241  | -3.97148587 | 0.15468191  |
| C | -3.89519585 | 0.73540583  | -0.57824298 |
| H | -3.78007853 | 0.73077569  | -1.65783004 |
| H | -3.63416177 | -0.23906857 | -0.15769475 |
| H | -4.91968368 | 1.01542439  | -0.33210946 |

C) Optimized coordinate of PCP3

i) In Gas phase

| Atomic Symbol | X | Y | Z |
|---------------|---|---|---|
|---------------|---|---|---|

|   |             |             |             |
|---|-------------|-------------|-------------|
| C | -0.19598947 | 1.54045988  | 1.48995103  |
| C | -1.22124422 | 1.49228963  | 0.55259499  |
| C | -0.94078375 | 1.49109531  | -0.81806662 |
| C | 0.34933220  | 1.88732351  | -1.18371263 |
| C | 1.38276925  | 1.90927123  | -0.24747369 |
| C | 1.17255135  | 1.48792037  | 1.09343748  |
| H | 0.53288707  | 2.07858231  | -2.23199903 |
| C | -0.25348941 | -1.78836895 | 1.17286627  |
| C | -1.40280769 | -1.79648730 | 0.35326346  |
| C | -1.28828162 | -1.30825738 | -0.97991840 |
| C | -0.00068698 | -1.32484333 | -1.58146509 |
| C | 1.13131492  | -1.31477981 | -0.73765206 |
| C | 0.98520218  | -1.38446859 | 0.64973687  |
| H | 2.12400208  | -1.20753952 | -1.15857920 |
| C | 2.18651728  | 0.65980990  | 1.88000205  |
| H | 3.21047879  | 0.98771358  | 1.70712946  |
| H | 2.05394830  | 0.78268100  | 2.95292546  |
| C | 2.11825092  | -0.92895431 | 1.54728567  |
| H | 3.07946820  | -1.19286530 | 1.09375786  |
| H | 2.08305145  | -1.44611929 | 2.51165443  |
| C | -1.95450472 | 1.01830465  | -1.84217388 |
| H | -2.84386105 | 1.66057901  | -1.84904742 |
| H | -1.50210983 | 1.09056331  | -2.83442003 |
| C | -2.41640829 | -0.46322447 | -1.57091798 |
| H | -2.86076804 | -0.83667499 | -2.49970179 |
| H | -3.22645514 | -0.44074633 | -0.83771763 |
| N | 2.76232604  | 2.39001229  | -0.71747098 |
| N | 0.11041848  | -1.18652256 | -2.96317542 |
| C | 2.66736358  | 3.16554519  | -2.02328108 |
| H | 1.90471365  | 3.93768109  | -1.93063755 |
| H | 3.64108013  | 3.62141605  | -2.20247543 |
| H | 2.43721064  | 2.48638894  | -2.84174414 |
| C | 3.32779779  | 3.37568504  | 0.29238384  |
| H | 3.45504180  | 2.89322377  | 1.25655295  |
| H | 4.29437389  | 3.72456231  | -0.07353771 |
| H | 2.63384693  | 4.21203833  | 0.37743099  |
| C | 3.76234515  | 1.27299203  | -0.96502488 |
| H | 3.95593650  | 0.72814258  | -0.04716329 |
| H | 3.34848044  | 0.60256250  | -1.71491131 |
| H | 4.68683629  | 1.72293147  | -1.33041884 |
| C | 1.42147490  | -1.01707091 | -3.57348527 |
| H | 1.94770476  | -0.16282729 | -3.13306996 |
| H | 2.06181877  | -1.90742758 | -3.47687898 |
| H | 1.29176712  | -0.80463751 | -4.63723893 |
| C | -0.83682744 | -1.90398586 | -3.83319576 |
| H | -1.51305620 | -2.51314804 | -3.23301460 |
| H | -1.42515314 | -1.21473545 | -4.45122671 |
| H | -0.29039716 | -2.57948206 | -4.50100850 |
| H | -2.25296314 | 1.37243507  | 0.85439649  |
| H | -0.31534347 | -2.08930395 | 2.21225107  |
| N | -0.58513071 | 1.70189158  | 2.96926781  |
| N | -2.67424506 | -2.12525081 | 0.84937716  |

|   |             |             |             |
|---|-------------|-------------|-------------|
| C | 0.23280894  | 2.82874453  | 3.57637741  |
| H | -0.05804216 | 2.93728313  | 4.62234949  |
| H | 1.29170615  | 2.59457913  | 3.51263667  |
| H | 0.01576833  | 3.74576859  | 3.02816275  |
| C | -0.44079248 | 0.44965590  | 3.81812515  |
| H | 0.60692932  | 0.21724837  | 3.97855690  |
| H | -0.92188338 | 0.63674536  | 4.77912598  |
| H | -0.92591799 | -0.36713935 | 3.29189306  |
| C | -2.03836759 | 2.13046760  | 3.11161365  |
| H | -2.19447993 | 2.40534406  | 4.15460959  |
| H | -2.22802060 | 2.98913442  | 2.46924861  |
| H | -2.69372936 | 1.29880938  | 2.85799648  |
| C | -2.80624264 | -2.48160406 | 2.25748147  |
| H | -3.86413857 | -2.64382554 | 2.47787085  |
| H | -2.25976500 | -3.39940324 | 2.52689232  |
| H | -2.46155235 | -1.66990517 | 2.90642882  |
| C | -3.51775008 | -3.00286375 | 0.01545041  |
| H | -4.57098934 | -2.83691521 | 0.26020115  |
| H | -3.37236768 | -2.79269938 | -1.04231079 |
| H | -3.28076852 | -4.06298111 | 0.18999069  |

ii) In MeCN solvent

| Atomic Symbol | X           | Y           | Z           |
|---------------|-------------|-------------|-------------|
| C             | -0.36135969 | 1.46773432  | 1.26070198  |
| C             | -1.26984390 | 1.18420039  | 0.24693280  |
| C             | -0.83320261 | 0.99298861  | -1.06754648 |
| C             | 0.45442540  | 1.44793455  | -1.36418310 |
| C             | 1.36747241  | 1.71649746  | -0.34589447 |
| C             | 1.04003166  | 1.47008238  | 1.01323390  |
| H             | 0.74059791  | 1.50739584  | -2.40520093 |
| C             | -0.04534634 | -1.87967918 | 1.42778389  |
| C             | -1.08499999 | -2.13010875 | 0.50835134  |
| C             | -0.86432782 | -1.83862026 | -0.86535093 |
| C             | 0.47748444  | -1.79579667 | -1.32009854 |
| C             | 1.50245461  | -1.56692243 | -0.38310458 |
| C             | 1.20503236  | -1.43296526 | 0.97879441  |
| H             | 2.52111998  | -1.41087235 | -0.71781517 |
| C             | 2.02863108  | 0.88080341  | 2.01577001  |
| H             | 3.02449476  | 1.30814652  | 1.91928953  |
| H             | 1.74187024  | 1.11256782  | 3.03738926  |
| C             | 2.17703904  | -0.72602692 | 1.90312886  |
| H             | 3.20335778  | -0.92744977 | 1.58044698  |
| H             | 2.08911872  | -1.11395619 | 2.92290320  |
| C             | -1.67610609 | 0.27086290  | -2.09998572 |
| H             | -2.63272857 | 0.78346586  | -2.25753991 |
| H             | -1.14057044 | 0.28217103  | -3.05184006 |
| C             | -1.99230154 | -1.21997073 | -1.68918371 |
| H             | -2.25995882 | -1.75773970 | -2.60543662 |
| H             | -2.88765730 | -1.21536423 | -1.06348330 |

|   |             |             |             |
|---|-------------|-------------|-------------|
| N | 2.72491417  | 2.30136968  | -0.72965479 |
| N | 0.71886949  | -1.81437835 | -2.70929521 |
| C | 2.69747726  | 2.88940951  | -2.13076056 |
| H | 1.85283763  | 3.57058050  | -2.21688875 |
| H | 3.63250004  | 3.42989035  | -2.26884297 |
| H | 2.63483920  | 2.09238504  | -2.86761082 |
| C | 3.04635647  | 3.47127219  | 0.18860720  |
| H | 3.14506306  | 3.12834685  | 1.21281301  |
| H | 3.98665698  | 3.90885631  | -0.14462119 |
| H | 2.23708102  | 4.19567077  | 0.10958655  |
| C | 3.86480051  | 1.30147049  | -0.70781212 |
| H | 4.00215266  | 0.90843832  | 0.29324428  |
| H | 3.63334000  | 0.49675847  | -1.40134657 |
| H | 4.76979401  | 1.81853041  | -1.02608084 |
| C | 2.06057800  | -1.51195550 | -3.18688405 |
| H | 2.39314281  | -0.54166496 | -2.81228326 |
| H | 2.80680426  | -2.27272837 | -2.90243821 |
| H | 2.03734957  | -1.45357838 | -4.27869101 |
| C | 0.14426582  | -2.93608797 | -3.46444275 |
| H | -0.81478492 | -3.23529700 | -3.04598987 |
| H | -0.00475929 | -2.64130620 | -4.50860751 |
| H | 0.81159564  | -3.81335709 | -3.44619072 |
| H | -2.31839951 | 1.03341036  | 0.46365727  |
| H | -0.22291516 | -1.96951030 | 2.49311020  |
| N | -0.91421632 | 1.84210343  | 2.63767956  |
| N | -2.37655181 | -2.52378721 | 0.91895583  |
| C | -0.20174158 | 3.09232826  | 3.13143493  |
| H | -0.64735499 | 3.37762791  | 4.08379407  |
| H | 0.85553825  | 2.88952106  | 3.26905099  |
| H | -0.34236553 | 3.87895878  | 2.39117003  |
| C | -0.82239681 | 0.75279662  | 3.68918940  |
| H | 0.21225712  | 0.56737645  | 3.95558285  |
| H | -1.36892559 | 1.09166557  | 4.56912317  |
| H | -1.27410133 | -0.14839183 | 3.28701683  |
| C | -2.38480731 | 2.22112740  | 2.55132050  |
| H | -2.66020372 | 2.64823973  | 3.51411299  |
| H | -2.52032823 | 2.95827061  | 1.76221561  |
| H | -2.98768476 | 1.33461872  | 2.36805275  |
| C | -2.63849775 | -2.65631935 | 2.34635078  |
| H | -3.69668421 | -2.89441441 | 2.48424330  |
| H | -2.04506789 | -3.45393858 | 2.82423163  |
| H | -2.44487910 | -1.71854206 | 2.87089415  |
| C | -2.97481776 | -3.64388733 | 0.17819128  |
| H | -4.05760311 | -3.64678588 | 0.33857148  |
| H | -2.78728732 | -3.54943645 | -0.89028931 |
| H | -2.57206830 | -4.61382488 | 0.51452878  |

iii) In THF solvent

| Atomic Symbol | X           | Y          | Z          |
|---------------|-------------|------------|------------|
| C             | -0.36138794 | 1.46798781 | 1.25620370 |

|   |             |             |             |
|---|-------------|-------------|-------------|
| C | -1.26804141 | 1.18483711  | 0.24095906  |
| C | -0.83002331 | 0.99503999  | -1.07353260 |
| C | 0.45741017  | 1.45243149  | -1.36814658 |
| C | 1.36904950  | 1.72080369  | -0.34830555 |
| C | 1.04080604  | 1.47457122  | 1.01109741  |
| H | 0.74479808  | 1.51157962  | -2.40895414 |
| C | -0.04474861 | -1.87492328 | 1.43255036  |
| C | -1.08533328 | -2.12645496 | 0.51424522  |
| C | -0.86572435 | -1.83303040 | -0.85943117 |
| C | 0.47570921  | -1.79114213 | -1.31602203 |
| C | 1.50113685  | -1.56053125 | -0.37980580 |
| C | 1.20510908  | -1.42856129 | 0.98220483  |
| H | 2.51977484  | -1.40682148 | -0.71529807 |
| C | 2.02933440  | 0.88646157  | 2.01492670  |
| H | 3.02525268  | 1.31388427  | 1.91759045  |
| H | 1.74304280  | 1.12120141  | 3.03623216  |
| C | 2.17727843  | -0.72151798 | 1.90571189  |
| H | 3.20409639  | -0.92420812 | 1.58506402  |
| H | 2.08968757  | -1.10782006 | 2.92618355  |
| C | -1.67165583 | 0.27061708  | -2.10538942 |
| H | -2.62499758 | 0.78659121  | -2.27188836 |
| H | -1.13167540 | 0.27194768  | -3.05468130 |
| C | -1.99428369 | -1.21496948 | -1.68308110 |
| H | -2.26909013 | -1.75675290 | -2.59467333 |
| H | -2.88709093 | -1.20199009 | -1.05375618 |
| N | 2.72935734  | 2.30168022  | -0.73135128 |
| N | 0.71604205  | -1.81048362 | -2.70440335 |
| C | 2.70702418  | 2.88875490  | -2.13328139 |
| H | 1.86691502  | 3.57537176  | -2.22141782 |
| H | 3.64565152  | 3.42336797  | -2.27206330 |
| H | 2.63929463  | 2.09149436  | -2.86952412 |
| C | 3.05256381  | 3.47163627  | 0.18594051  |
| H | 3.14383734  | 3.13062152  | 1.21167926  |
| H | 3.99657636  | 3.90454343  | -0.14319232 |
| H | 2.24744287  | 4.20053153  | 0.10142701  |
| C | 3.86670195  | 1.29813909  | -0.70724579 |
| H | 3.99627334  | 0.89930362  | 0.29246537  |
| H | 3.63737666  | 0.49670388  | -1.40546418 |
| H | 4.77511999  | 1.81448923  | -1.01718465 |
| C | 2.05819678  | -1.51357172 | -3.18394292 |
| H | 2.39385284  | -0.54193641 | -2.81392871 |
| H | 2.80259214  | -2.27495813 | -2.89720025 |
| H | 2.03423197  | -1.46032167 | -4.27593411 |
| C | 0.13467200  | -2.92770035 | -3.46278962 |
| H | -0.82062201 | -3.22999802 | -3.03843915 |
| H | -0.02220630 | -2.62638408 | -4.50382877 |
| H | 0.80222340  | -3.80429086 | -3.45425218 |
| H | -2.31703343 | 1.03279424  | 0.45519267  |
| H | -0.21938273 | -1.97031852 | 2.49785815  |
| N | -0.91805082 | 1.83694755  | 2.63406914  |
| N | -2.37512845 | -2.52090947 | 0.92685157  |
| C | -0.21312515 | 3.09112638  | 3.12812962  |

|   |             |             |             |
|---|-------------|-------------|-------------|
| H | -0.67431357 | 3.38865540  | 4.06944214  |
| H | 0.84143559  | 2.88780967  | 3.28644258  |
| H | -0.33870696 | 3.87020944  | 2.37652964  |
| C | -0.81993778 | 0.74582034  | 3.68351085  |
| H | 0.21584890  | 0.56610389  | 3.94937821  |
| H | -1.36936342 | 1.07803343  | 4.56432912  |
| H | -1.26409362 | -0.15762943 | 3.27753623  |
| C | -2.39154359 | 2.20553760  | 2.54859023  |
| H | -2.67341730 | 2.61926743  | 3.51552748  |
| H | -2.53188564 | 2.95086489  | 1.76795377  |
| H | -2.98683772 | 1.31628954  | 2.35301829  |
| C | -2.62984098 | -2.66644846 | 2.35458537  |
| H | -3.68591688 | -2.91127646 | 2.49549228  |
| H | -2.03026621 | -3.46472943 | 2.82291061  |
| H | -2.43889676 | -1.73177155 | 2.88687010  |
| C | -2.98012216 | -3.63487399 | 0.18023770  |
| H | -4.06270132 | -3.63270735 | 0.34111150  |
| H | -2.79238310 | -3.53641690 | -0.88761851 |
| H | -2.58139112 | -4.60739548 | 0.51204215  |

2) One photon data for PCP1, PCP2 and PCP3 in gas phase calculated at BLYP and B3LYP functionals and cc-pVDZ basis set

#### BLYP Results

| Systems | $\omega_{of}$ (eV) | Orbitals    | $\Lambda$ |
|---------|--------------------|-------------|-----------|
| PCP1    | 0.78               | H-L (0.71)  | 0.192     |
| PCP2    | 1.06               | H-L (-0.71) | 0.211     |
| PCP3    | 1.02               | H-L (0.71)  | 0.196     |

#### B3LYP Results

| Systems | $\omega_{of}$ (eV) | Orbitals    | $\Lambda$ |
|---------|--------------------|-------------|-----------|
| PCP1    | 1.53               | H-L (0.71)  | 0.195     |
| PCP2    | 1.80               | H-L (-0.71) | 0.214     |
| PCP3    | 1.77               | H-L (-0.70) | 0.185     |

3)  $\delta^{3PA}$  ( $10^6$  a.u.) and one-photon excitation energies ( $\omega_{of}$ , in eV) of all the systems in gas phase calculated by varying the  $\mu$ -parameter of CAMB3LYP functional

| System | Gas phase $\delta^{3PA}$ and $\omega_{of}$ of all the systems for different $\mu$ -parameter of CAMB3LYP functional |      |      |      |      |      |      |      |
|--------|---------------------------------------------------------------------------------------------------------------------|------|------|------|------|------|------|------|
|        | $\mu \rightarrow$                                                                                                   | 0.20 | 0.25 | 0.30 | 0.35 | 0.40 | 0.45 | 0.50 |
| PCP1   | $\delta^{3PA}$                                                                                                      | 8.18 | 5.41 | 3.99 | 3.13 | 2.57 | 2.19 | 1.91 |

|      |                |       |       |       |       |       |       |       |
|------|----------------|-------|-------|-------|-------|-------|-------|-------|
|      | $\omega_{0f}$  | 2.06  | 2.26  | 2.43  | 2.56  | 2.67  | 2.76  | 2.83  |
| PCP2 | $\delta^{3PA}$ | 4.02  | 2.70  | 2.05  | 1.64  | 1.37  | 1.18  | 1.05  |
|      | $\omega_{0f}$  | 2.32  | 2.52  | 2.68  | 2.81  | 2.92  | 3.00  | 3.07  |
| PCP  | $\delta^{3PA}$ | 26.19 | 21.30 | 17.80 | 15.20 | 13.50 | 12.20 | 11.30 |
|      | $\omega_{0f}$  | 2.29  | 2.49  | 2.65  | 2.79  | 2.90  | 2.99  | 3.06  |
